# Supplementary material
Source: PubMed Central journal article supplement (PMC4974090)
Supplement: mmc1.pdf [file mmc1.pdf]

**The American Journal of Human Genetics, Volume 99**

**Supplemental Data**

**Constrained Score Statistics**

**Identify Genetic Variants Interacting**

**with Multiple Risk Factors in Barrett's Esophagus**

**James Y. Dai, Jean de Dieu Tapsoba, Matthew F. Buas, the BEACON Consortium, Harvey A. Risch, and Thomas L. Vaughan**

## Supplementary Materials

### BEACON consortium authors

**Wong-Ho Chow** Department of Epidemiology, MD Anderson Cancer Center, Houston, TX, USA

**Nicholas J. Shaheen**

Division of Gastroenterology and Hepatology, University of North Carolina School of Medicine, University of North Carolina, Chapel Hill, North Carolina, USA

**Lesley Anderson**

Centre for Public Health, Queen's University, Belfast, Northern Ireland

**Douglas A. Corley**

Division of Research, Kaiser Permanente Northern California, Oakland, California, USA

San Francisco Medical Center, Kaiser Permanente Northern California, San Francisco, California,

**Marilie D. Gammon**

Department of Epidemiology, University of North Carolina at Chapel Hill, NC, USA

**Laura J. Hardie**

Division of Epidemiology, University of Leeds, Leeds, UK

**Jesper Lagergren**

Department of Molecular Medicine and Surgery, Karolinska Institutet, Stockholm, Sweden

Division of Cancer Studies, King's College London, London, United Kingdom

**David C. Whiteman** Cancer Control, QIMR Berghofer Medical Research Institute, Brisbane QLD, Australia

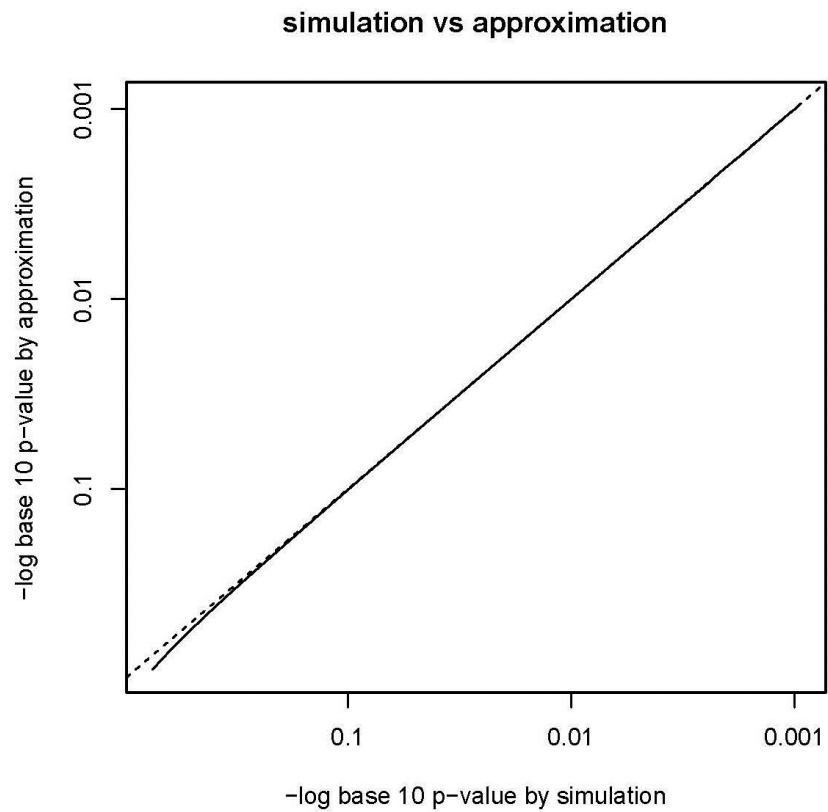

**Figure S1.** Comparison of the simulation-based p-value and the approximation based p-values for the score statistic for the bidirectional test. The p-value is computed for  $p=3$ , the 3-dimensional standard multivariate normal distribution.

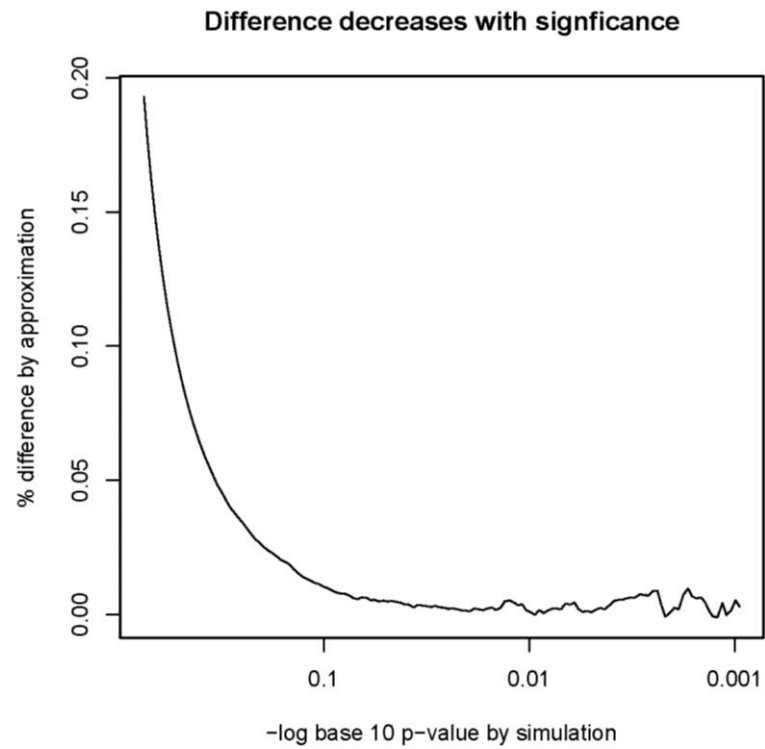

**Figure S2.** The percentage difference between the simulation-based p-value and the approximation based p-values decreases with the size of p-value. The p-value is computed for bidirectional test with  $p=3$ , the 3-dimensional standard multivariate normal distribution.

### BE: Score Test for Proportional GxE effects - Without Correction

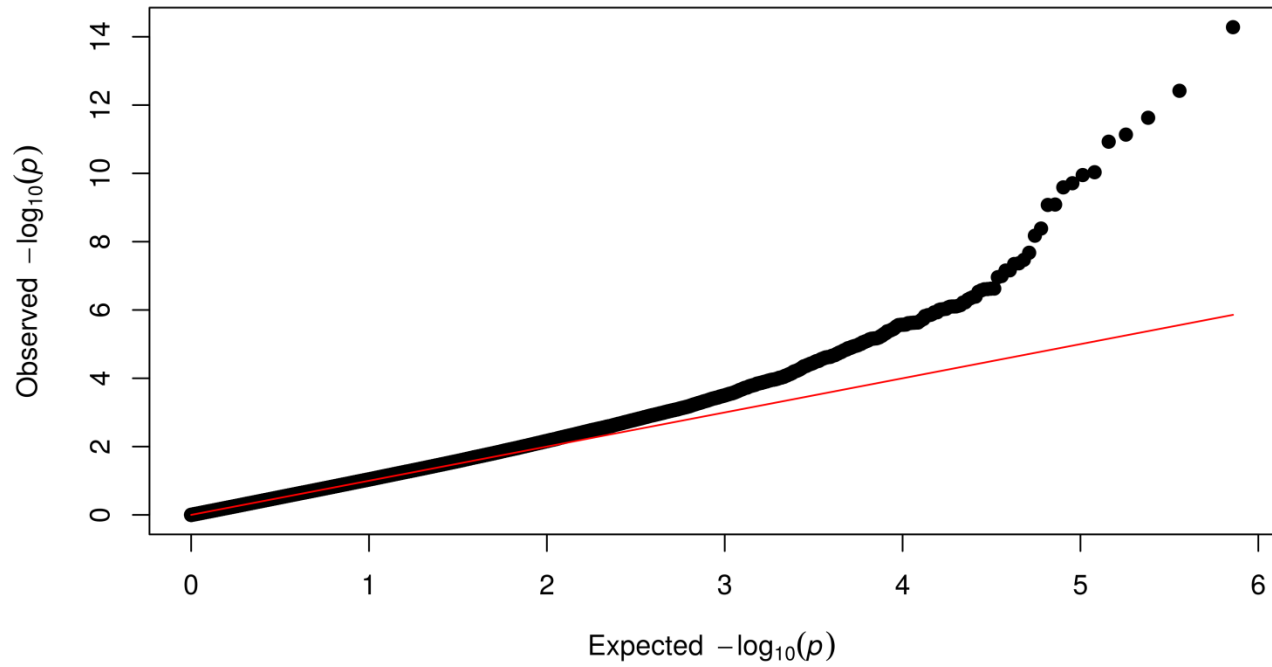

Figure S3. The q-q plot from the score test for 1df proportional interactions on Barrett's esophagus (without correction). The 1-df Chi-square test takes the standard forms of mean and variance for the Rao score statistic.

### BE: Tukey test for proportional interactions (Correction 1)

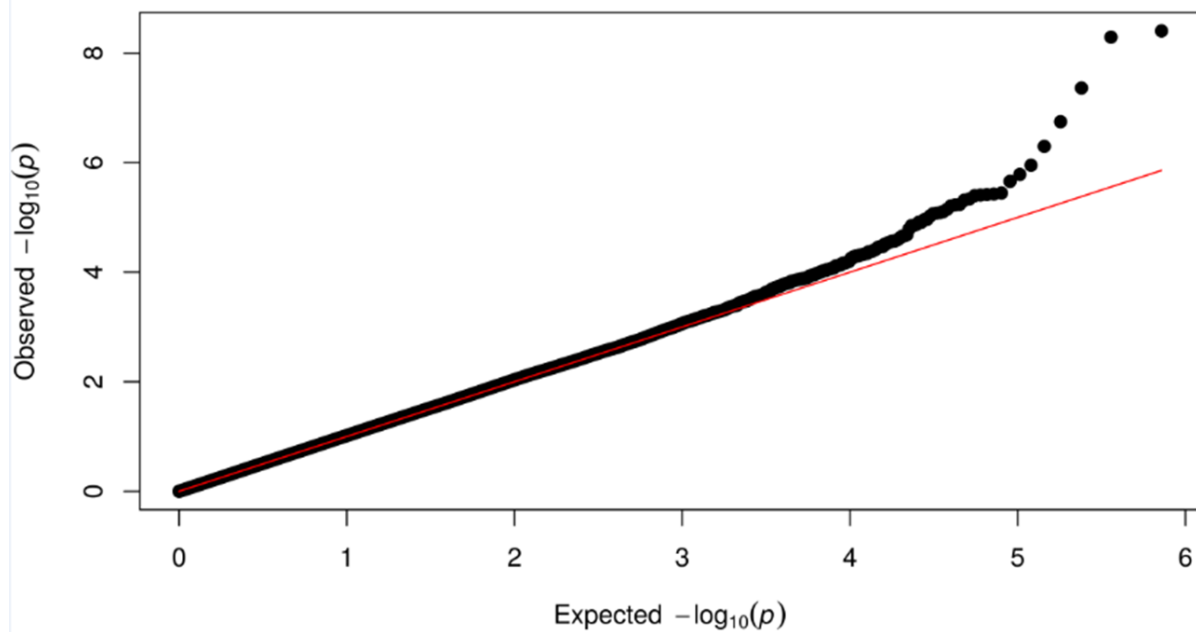

Figure S4. The q-q plot from the score test for 1df proportional interactions on Barrett's esophagus with the first-order correction. The 1-df Chi-square test takes the corrected forms of mean and variance for the Rao score statistic after the first-order Taylor expansion.

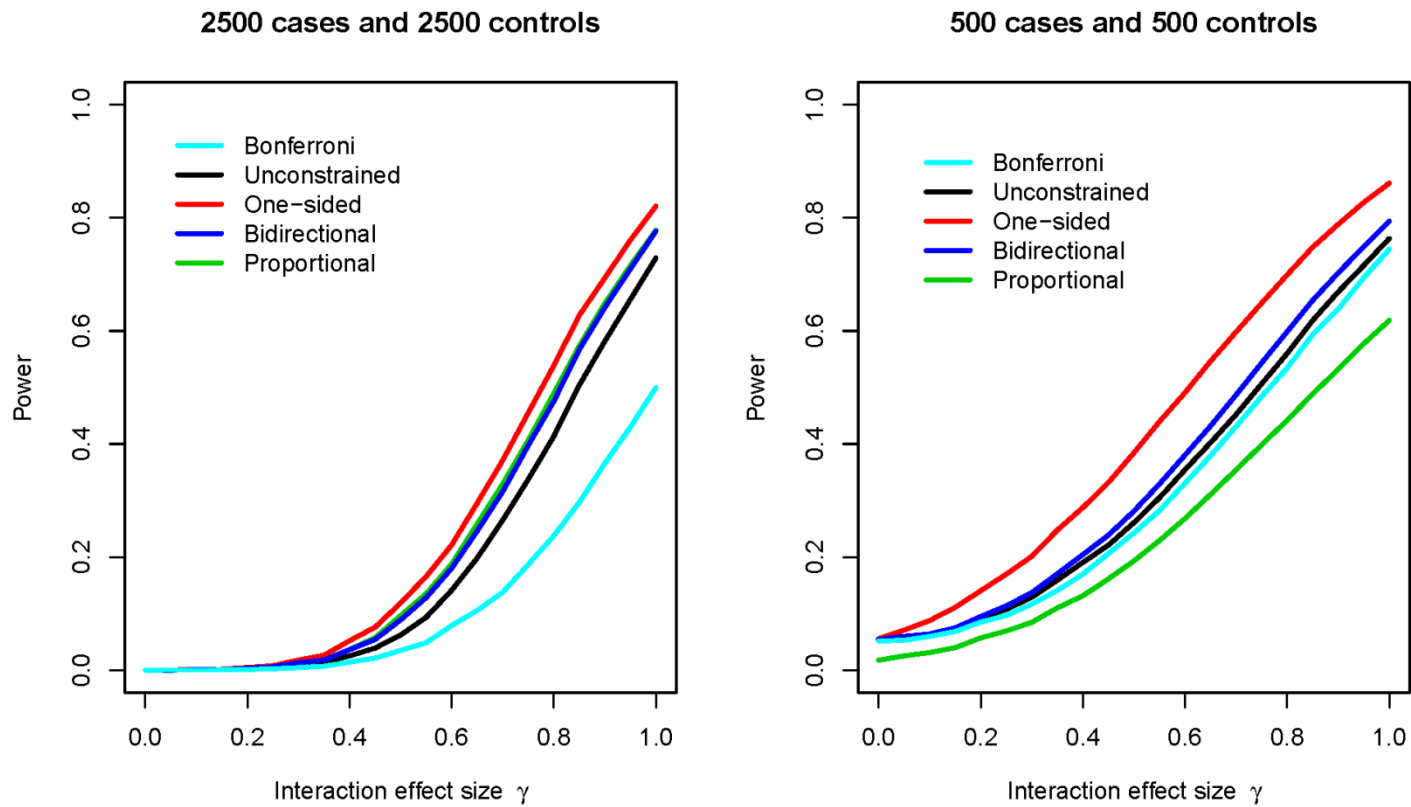

Figure S5. The power of the various test when the main environmental effect is (0.4,0.4,0.4), and all other parameters are the same as Figure 1(a) and Figure 1(b). The left panel shows the scenario with 2500 cases and 2500 controls, the right panel shows the scenario with 500 cases and 500 controls.

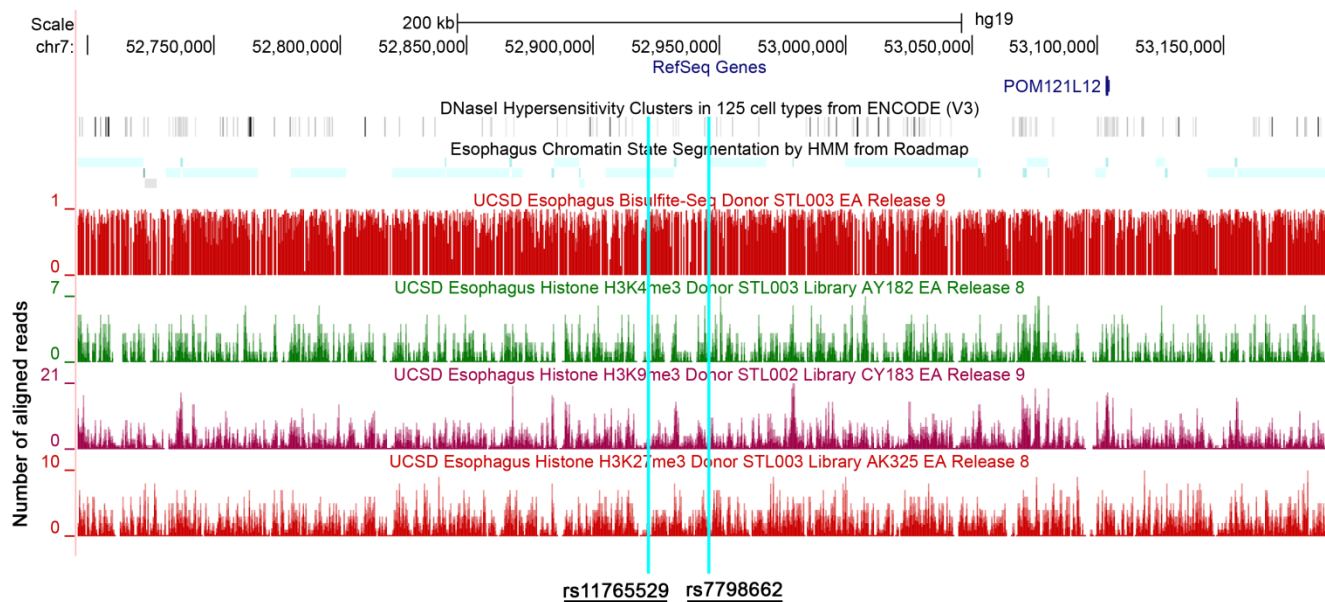

**Figure S6A. NIH Roadmap Epigenome Atlas characterization of a ~500-kb region encompassing rs7798662 and rs11765529.** Patterns of DNA methylation (Bisulfite-Seq) and key histone modifications (H3K4me3, H3K9me3, H3K27me3) detected in esophageal tissue are displayed. The locus is segmented into regions of “integrative chromatin states” based on a Hidden Markov Model (HMM)-based algorithm (<http://www.roadmapepigenomics.org/>). Genomic positions are indicated for the two SNPs of interest (underlined).



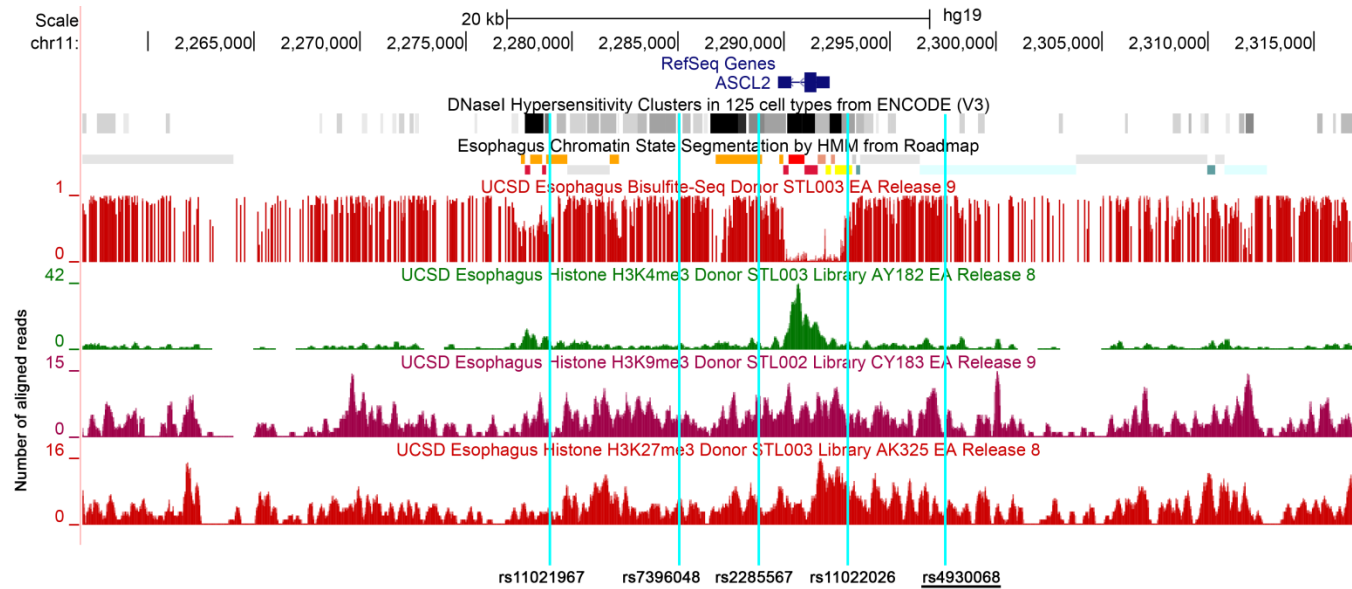

**Figure S6B. NIH Roadmap Epigenome Atlas characterization of a ~60-kb region encompassing rs4930068.** Patterns of DNA methylation (Bisulfite-Seq) and key histone modifications (H3K4me3, H3K9me3, H3K27me3) detected in esophageal tissue are displayed. The locus is segmented into regions of “integrative chromatin states” based on a Hidden Markov Model (HMM)-based algorithm (<http://www.roadmapepigenomics.org/>). Genomic positions are indicated for the index SNP (underlined) and four additional variants in high LD ( $r^2 > 0.8$ ) with rs4930068.

**Table S1. Functional annotations for variants in high LD ( $r^2 > 0.8$ ) with rs7798662.**

|    | SNP         | $r^{2(a)}$ | Distance <sup>b</sup> | Location              | Promoter <sup>c</sup> | Enhancer <sup>d</sup>              | DNase <sup>e</sup> | Proteins <sup>f</sup> | eQTL <sup>g</sup> | Motifs <sup>h</sup>                                                  |
|----|-------------|------------|-----------------------|-----------------------|-----------------------|------------------------------------|--------------------|-----------------------|-------------------|----------------------------------------------------------------------|
| 1  | rs17691637  | 1          | 38367                 | 196kb 5' of POM121L12 |                       | ESDR, <b>GI</b> , OVRY, PLCNT, VAS |                    |                       |                   | ZBTB33                                                               |
| 2  | rs10488504  | 1          | 38256                 | 196kb 5' of POM121L12 |                       |                                    |                    |                       |                   | DMRT2,DMRT3,DMRT7,Sox,Zfp187                                         |
| 3  | rs112884530 | 1          | 36857                 | 194kb 5' of POM121L12 |                       |                                    |                    |                       |                   | EWSR1-FLI1, Hbp1, MAZ, Mef2, Znf143                                  |
| 4  | rs17613916  | 1          | 36086                 | 193kb 5' of POM121L12 |                       | BRN                                |                    |                       |                   |                                                                      |
| 5  | rs11766226  | 1          | 32207                 | 190kb 5' of POM121L12 |                       |                                    |                    |                       |                   | E2F,Maf,NF-kappaB,Sox,Zfp410                                         |
| 6  | rs112045720 | 1          | 31243                 | 189kb 5' of POM121L12 |                       |                                    |                    |                       |                   | Arid3a,CTCF,Foxq1,Pou3f2                                             |
| 7  | rs75557256  | 1          | 30940                 | 188kb 5' of POM121L12 |                       |                                    |                    |                       |                   | CDP,RREB-1                                                           |
| 8  | rs79160007  | 1          | 30930                 | 188kb 5' of POM121L12 |                       |                                    |                    |                       |                   | GR,Sox                                                               |
| 9  | rs78469163  | 1          | 30884                 | 188kb 5' of POM121L12 |                       |                                    |                    |                       |                   | CDP                                                                  |
| 10 | rs80103923  | 1          | 30882                 | 188kb 5' of POM121L12 |                       |                                    |                    |                       |                   | CDP,Pou1f1                                                           |
| 11 | rs111641968 | 1          | 30462                 | 188kb 5' of POM121L12 |                       |                                    |                    |                       |                   | CACD,NRSF,Zfx                                                        |
| 12 | rs113515559 | 0.93       | 30381                 | 188kb 5' of POM121L12 |                       |                                    |                    |                       |                   | GR,YY1                                                               |
| 13 | rs74620601  | 1          | 30124                 | 188kb 5' of POM121L12 |                       |                                    | BRN                | JUND                  |                   | AP-1,Gfi1                                                            |
| 14 | rs112264971 | 1          | 29939                 | 187kb 5' of POM121L12 |                       |                                    |                    |                       |                   | Crx,XBP-1                                                            |
| 15 | rs79429223  | 1          | 29407                 | 187kb 5' of POM121L12 |                       |                                    |                    |                       |                   | AP-1                                                                 |
| 16 | rs75314167  | 1          | 28589                 | 186kb 5' of POM121L12 |                       |                                    |                    |                       |                   | Gfi1,Pax-5,SP2                                                       |
| 17 | rs74676024  | 1          | 28144                 | 186kb 5' of POM121L12 |                       |                                    | BLD                |                       |                   | Irf,Pax-5,RXRA,p300                                                  |
| 18 | rs75276194  | 1          | 28114                 | 186kb 5' of POM121L12 |                       |                                    |                    |                       |                   | CDP                                                                  |
| 19 | rs111642729 | 1          | 27892                 | 185kb 5' of POM121L12 |                       |                                    |                    |                       |                   | Irf,Pou2f2,Pou3f3,Pou5f1,Sox                                         |
| 20 | rs113494626 | 1          | 27414                 | 185kb 5' of POM121L12 |                       |                                    |                    |                       |                   | Foxj1,Foxk1,RXRA                                                     |
| 21 | rs75710970  | 1          | 27357                 | 185kb 5' of POM121L12 |                       |                                    |                    |                       |                   | Cdc5,Pax-4,p53                                                       |
| 22 | rs76973260  | 1          | 26484                 | 184kb 5' of POM121L12 |                       |                                    |                    |                       |                   | ATF3,Arnt,BHLHE40,Ets,Gfi1,Myc,NF-E2,SIRT6,SREBP,Sin3Ak-20,TFE       |
| 23 | rs80121386  | 1          | 26403                 | 184kb 5' of POM121L12 |                       |                                    |                    |                       |                   | E2F,Hoxa10,Nanog,Pou2f2,Pou3f2,Sox                                   |
| 24 | rs17614229  | 1          | 26381                 | 184kb 5' of POM121L12 |                       |                                    |                    |                       |                   | HMG-IY,Irf,Nanog,Pbx-1, Pou1f1, Pou2f2, Pou3f2, Pou3f3, Pou5f1, TATA |
| 25 | rs76100117  | 1          | 24792                 | 182kb 5' of POM121L12 |                       | ESC, OVRY                          |                    |                       |                   | Foxp1,IRC900814,Mef2,NRSF,RFX5                                       |
| 26 | rs75931245  | 1          | 24784                 | 182kb 5' of POM121L12 |                       | ESC, OVRY                          |                    |                       |                   | Foxf2,Mef2,Myf,NRSF,Sin3Ak-20,ZEB1                                   |

|    |                   |                         |                             |                       |                             |                             |                          |                             |                         |                                                   |
|----|-------------------|-------------------------|-----------------------------|-----------------------|-----------------------------|-----------------------------|--------------------------|-----------------------------|-------------------------|---------------------------------------------------|
| 27 | rs111256487       | 1                       | 24624                       | 182kb 5' of POM121L12 |                             | ESC, OVRY                   |                          |                             |                         | Bcl6b,CEBPB,Hsf,STAT                              |
| 28 | rs74629733        | 1                       | 24560                       | 182kb 5' of POM121L12 |                             | ESC, OVRY                   |                          |                             |                         |                                                   |
|    | <b>SNP</b>        | <b>r<sup>2(a)</sup></b> | <b>Distance<sup>b</sup></b> | <b>Location</b>       | <b>Promoter<sup>c</sup></b> | <b>Enhancer<sup>d</sup></b> | <b>DNase<sup>e</sup></b> | <b>Proteins<sup>f</sup></b> | <b>eQTL<sup>g</sup></b> | <b>Motifs<sup>h</sup></b>                         |
| 29 | rs77873291        | 1                       | 24520                       | 182kb 5' of POM121L12 |                             | OVRY                        |                          |                             |                         | AIRE,Gfi1,Ik-2,NF-AT,Pou2f2                       |
| 30 | rs77842860        | 1                       | 24385                       | 182kb 5' of POM121L12 |                             | OVRY                        |                          |                             |                         | HNF1,Mef2,Pbx-1                                   |
| 31 | rs75082417        | 1                       | 24370                       | 182kb 5' of POM121L12 |                             | OVRY                        |                          |                             |                         | Pou2f2                                            |
| 32 | <b>rs11765529</b> | 1                       | 23722                       | 181kb 5' of POM121L12 |                             |                             |                          |                             |                         | HDAC2,Zbtb3                                       |
| 33 | rs11769735        | 1                       | 23708                       | 181kb 5' of POM121L12 |                             |                             |                          |                             |                         |                                                   |
| 34 | rs11772201        | 1                       | 23704                       | 181kb 5' of POM121L12 |                             |                             |                          |                             |                         | Arid5b                                            |
| 35 | rs11769032        | 1                       | 23691                       | 181kb 5' of POM121L12 |                             |                             |                          |                             |                         | Arid5b,Fox,p300                                   |
| 36 | rs78683211        | 1                       | 23505                       | 181kb 5' of POM121L12 |                             |                             |                          |                             |                         | Arid5a,Foxa,Pou5f1,Sox                            |
| 37 | rs75960827        | 1                       | 23121                       | 181kb 5' of POM121L12 |                             |                             |                          |                             |                         | Arid5b,Cdx2,Hoxa10,Hoxb13,Hoxb9,Hoxd10,Pou2f2,Sox |
| 38 | rs77416190        | 1                       | 22654                       | 180kb 5' of POM121L12 |                             |                             |                          |                             |                         | Foxa,Foxf1,TCF12,p300                             |
| 39 | rs111384348       | 1                       | 22307                       | 180kb 5' of POM121L12 |                             |                             |                          |                             |                         |                                                   |
| 40 | rs11767295        | 1                       | 22045                       | 179kb 5' of POM121L12 |                             |                             |                          |                             |                         | CEBPB,GATA,XBP-1,p300                             |
| 41 | rs11767394        | 1                       | 21753                       | 179kb 5' of POM121L12 |                             |                             |                          |                             |                         | Foxa                                              |
| 42 | rs11767396        | 1                       | 21736                       | 179kb 5' of POM121L12 |                             |                             |                          |                             |                         |                                                   |
| 43 | rs11760456        | 1                       | 21678                       | 179kb 5' of POM121L12 |                             |                             |                          |                             |                         | Cdx,Evi-1,Foxj1,TATA                              |
| 44 | rs112287825       | 1                       | 21195                       | 179kb 5' of POM121L12 |                             |                             |                          |                             |                         | HNF4,Pou2f2,RAR,RXR::LXR,RXRA,TATA                |
| 45 | rs112743003       | 1                       | 21086                       | 178kb 5' of POM121L12 |                             |                             |                          |                             |                         | AhR,Egr-1,Pax-6,RFX5                              |
| 46 | rs77462617        | 1                       | 20423                       | 178kb 5' of POM121L12 |                             |                             |                          |                             |                         |                                                   |
| 47 | rs77737967        | 1                       | 20296                       | 178kb 5' of POM121L12 |                             |                             |                          |                             |                         | RXRA                                              |
| 48 | rs111231293       | 1                       | 19389                       | 177kb 5' of POM121L12 |                             |                             |                          |                             |                         | Evi-1,FAC1                                        |
| 49 | rs11773824        | 1                       | 18959                       | 176kb 5' of POM121L12 |                             |                             |                          |                             |                         | Foxk1,Foxp1,Irf,Mef2                              |
| 50 | rs11763206        | 1                       | 18930                       | 176kb 5' of POM121L12 |                             |                             |                          |                             |                         | Arnt,E2A,Mtf1,Myc,Rad21                           |
| 51 | rs11770293        | 1                       | 18761                       | 176kb 5' of POM121L12 |                             |                             |                          |                             |                         | GATA                                              |
| 52 | rs75553733        | 1                       | 17969                       | 175kb 5' of POM121L12 |                             |                             |                          |                             |                         | Foxj2,PLZF,Pou3f2,Sox,TATA                        |
| 53 | rs113629168       | 1                       | 17823                       | 175kb 5' of POM121L12 |                             |                             |                          |                             |                         |                                                   |
| 54 | rs17692657        | 1                       | 17523                       | 175kb 5' of POM121L12 |                             |                             |                          |                             |                         | AP-1,E2F,Foxp1,Irf,NF-Y,Pbx3,RFX5,SP1,SP2,Znf143  |
| 55 | rs79478382        | 1                       | 17334                       | 175kb 5' of POM121L12 |                             |                             |                          |                             |                         | LUN-1,Roaz                                        |
| 56 | rs74496138        | 1                       | 17287                       | 175kb 5' of POM121L12 |                             |                             |                          |                             |                         | Hdx,NF-Y,STAT                                     |
| 57 | rs77799175        | 1                       | 17267                       | 175kb 5' of POM121L12 |                             |                             |                          |                             |                         | TATA                                              |

|    |             |                         |                             |                       |                             |                             |                          |                             |                         |                                                                                                                                 |
|----|-------------|-------------------------|-----------------------------|-----------------------|-----------------------------|-----------------------------|--------------------------|-----------------------------|-------------------------|---------------------------------------------------------------------------------------------------------------------------------|
| 58 | rs111781807 | 1                       | 16981                       | 174kb 5' of POM121L12 |                             |                             |                          |                             |                         | ERalpha-a,ZID                                                                                                                   |
| 59 | rs112685756 | 1                       | 16615                       | 174kb 5' of POM121L12 |                             |                             |                          |                             |                         | AP-1,ELF1                                                                                                                       |
|    | <b>SNP</b>  | <b>r<sup>2(a)</sup></b> | <b>Distance<sup>b</sup></b> | <b>Location</b>       | <b>Promoter<sup>c</sup></b> | <b>Enhancer<sup>d</sup></b> | <b>DNase<sup>e</sup></b> | <b>Proteins<sup>f</sup></b> | <b>eQTL<sup>g</sup></b> | <b>Motifs<sup>h</sup></b>                                                                                                       |
| 60 | rs10488501  | 1                       | 16218                       | 174kb 5' of POM121L12 |                             |                             |                          |                             |                         | Evi-1,GATA,Hltf                                                                                                                 |
| 61 | rs113188931 | 1                       | 15714                       | 173kb 5' of POM121L12 |                             |                             |                          |                             |                         | CTCF,E2A,ERalpha-a,Esr2,Mrg,SREBP,Tgif1                                                                                         |
| 62 | rs80001306  | 1                       | 15387                       | 173kb 5' of POM121L12 |                             | VAS                         |                          |                             |                         | HNF4,Pax-4                                                                                                                      |
| 63 | rs77106104  | 1                       | 15257                       | 173kb 5' of POM121L12 |                             |                             |                          |                             |                         | Bbx,Bsx,Cart1,Dbx2,Esx1,Foxj2,Gbx1,HMG-IY, Hoxa5, Hoxa7, Hoxb7, Hoxd8, Lhx3, Ncx, Nkx6-1, Pax-4, Pou2f2, Pou3f2, Pou3f4, Pou6f1 |
| 64 | rs113303892 | 1                       | 15075                       | 172kb 5' of POM121L12 |                             |                             |                          |                             |                         | Crx,Gsc,Obox3,Otx2,Pitx3,RORalpha1,RREB-1,SIX5                                                                                  |
| 65 | rs111886202 | 1                       | 14855                       | 172kb 5' of POM121L12 |                             |                             |                          |                             |                         | Mef2                                                                                                                            |
| 66 | rs75350842  | 1                       | 14712                       | 172kb 5' of POM121L12 |                             |                             |                          |                             |                         | CDP,Pax-4,Pou2f2,Pou3f2                                                                                                         |
| 67 | rs112225991 | 1                       | 14669                       | 172kb 5' of POM121L12 |                             |                             |                          |                             |                         | Pax-4,Spz1                                                                                                                      |
| 68 | rs4358759   | 1                       | 14140                       | 172kb 5' of POM121L12 |                             |                             |                          |                             |                         |                                                                                                                                 |
| 69 | rs11762984  | 1                       | 13796                       | 171kb 5' of POM121L12 |                             |                             | PANC                     |                             |                         | ATF3                                                                                                                            |
| 70 | rs77503606  | 1                       | 13578                       | 171kb 5' of POM121L12 |                             |                             |                          |                             |                         |                                                                                                                                 |
| 71 | rs77874117  | 1                       | 13456                       | 171kb 5' of POM121L12 |                             |                             |                          |                             |                         | Mrg1::Hoxa9                                                                                                                     |
| 72 | rs112393748 | 1                       | 13093                       | 171kb 5' of POM121L12 |                             |                             | IPSC                     |                             |                         | Foxp3,Nkx3,SIX5                                                                                                                 |
| 73 | rs11771017  | 1                       | 12782                       | 170kb 5' of POM121L12 |                             |                             |                          |                             |                         | Arid5b,LBP-1,TATA                                                                                                               |
| 74 | rs11760967  | 1                       | 12545                       | 170kb 5' of POM121L12 |                             |                             |                          |                             |                         | AIRE                                                                                                                            |
| 75 | rs11761682  | 1                       | 12258                       | 170kb 5' of POM121L12 |                             |                             |                          |                             |                         |                                                                                                                                 |
| 76 | rs112670870 | 1                       | 11785                       | 169kb 5' of POM121L12 |                             |                             |                          |                             |                         | Dobox4,Nkx3                                                                                                                     |
| 77 | rs77846464  | 1                       | 11602                       | 169kb 5' of POM121L12 |                             |                             |                          |                             |                         | AIRE,CIZ,DMRT1                                                                                                                  |
| 78 | rs77201830  | 1                       | 11275                       | 169kb 5' of POM121L12 | VAS                         |                             |                          |                             |                         |                                                                                                                                 |
| 79 | rs76176075  | 1                       | 11228                       | 169kb 5' of POM121L12 | VAS                         |                             |                          |                             |                         | CTCF,Mef2,Rad21                                                                                                                 |
| 80 | rs76947106  | 1                       | 11085                       | 168kb 5' of POM121L12 | VAS                         |                             |                          |                             |                         | STAT,Sox,ZEB1                                                                                                                   |
| 81 | rs113653466 | 1                       | 10431                       | 168kb 5' of POM121L12 |                             |                             |                          |                             |                         | Foxm1,Nkx2,Nkx3,YY1                                                                                                             |
| 82 | rs75547585  | 1                       | 10159                       | 168kb 5' of POM121L12 |                             |                             |                          |                             |                         | Crx,Rad21                                                                                                                       |
| 83 | rs112321404 | 1                       | 9929                        | 167kb 5' of POM121L12 |                             |                             |                          |                             |                         | Tgif1                                                                                                                           |
| 84 | rs113117967 | 1                       | 9599                        | 167kb 5' of POM121L12 |                             |                             |                          |                             |                         | FAC1,Foxo,Foxp1,Pax-4,RREB-1, SIX5, STAT, Zfp105                                                                                |
| 85 | rs11765486  | 1                       | 8758                        | 166kb 5' of POM121L12 |                             |                             |                          |                             |                         | Irx,TR4                                                                                                                         |
| 86 | rs111437435 | 1                       | 8067                        | 165kb 5' of POM121L12 |                             |                             |                          |                             |                         |                                                                                                                                 |
| 87 | rs76909095  | 1                       | 7891                        | 165kb 5' of POM121L12 |                             |                             |                          |                             |                         | GATA,Lhx8                                                                                                                       |

|     |                  |            |                             |                       |                             |                             |                          |                             |                         |                                                                       |
|-----|------------------|------------|-----------------------------|-----------------------|-----------------------------|-----------------------------|--------------------------|-----------------------------|-------------------------|-----------------------------------------------------------------------|
| 88  | rs113691255      | 1          | 7799                        | 165kb 5' of POM121L12 |                             |                             |                          |                             |                         | CDP,CTCF,SEF-1,Sox                                                    |
| 89  | rs77466972       | 1          | 7733                        | 165kb 5' of POM121L12 |                             |                             | GI                       |                             |                         | PLZF,Pou6f1,Zfp187                                                    |
|     | <b>SNP</b>       | $r^{2(a)}$ | <b>Distance<sup>b</sup></b> | <b>Location</b>       | <b>Promoter<sup>c</sup></b> | <b>Enhancer<sup>d</sup></b> | <b>DNase<sup>e</sup></b> | <b>Proteins<sup>f</sup></b> | <b>eQTL<sup>g</sup></b> | <b>Motifs<sup>h</sup></b>                                             |
| 90  | rs77581067       | 1          | 7725                        | 165kb 5' of POM121L12 |                             |                             |                          |                             |                         | ATF2,Ik-2,NF-AT1, PLZF, Pou2f2, YY1, Zfp410                           |
| 91  | rs74687520       | 1          | 7303                        | 165kb 5' of POM121L12 |                             |                             |                          |                             |                         | EWSR1-FLI1,Ik-1,TFII-I                                                |
| 92  | rs117249146      | 1          | 6987                        | 164kb 5' of POM121L12 |                             |                             |                          |                             |                         | Foxp1,HDAC2,HMG-IY,HNF1,Mef2,TATA                                     |
| 93  | rs75267662       | 1          | 6106                        | 164kb 5' of POM121L12 |                             |                             | IPSC                     |                             |                         | Maf,Sox                                                               |
| 94  | rs77267459       | 1          | 6084                        | 163kb 5' of POM121L12 |                             |                             | IPSC                     |                             |                         |                                                                       |
| 95  | rs78645775       | 1          | 5085                        | 162kb 5' of POM121L12 |                             |                             |                          |                             |                         | RFX5,ZEB1,Zfp105                                                      |
| 96  | rs76627272       | 1          | 5025                        | 162kb 5' of POM121L12 |                             |                             |                          |                             |                         | DBP,Fox,Foxa,Foxd1,Foxd3,Foxi1,Foxj1,Foxj2,Foxq1,HDA C2,Hmx,NF-Y,p300 |
| 97  | rs6977746        | 1          | 4547                        | 162kb 5' of POM121L12 |                             |                             |                          |                             |                         | CEBPB,Evi-1,HNF1,Mef2,Osf2,PEBP,Pax-4                                 |
| 98  | rs6958403        | 1          | 4474                        | 162kb 5' of POM121L12 |                             |                             |                          |                             |                         | ERalpha-a,PLZF,Pax-5,RXRA                                             |
| 99  | rs6943949        | 1          | 4455                        | 162kb 5' of POM121L12 |                             |                             |                          |                             |                         | GATA,ZEB1                                                             |
| 100 | rs112665251      | 1          | 4001                        | 161kb 5' of POM121L12 |                             |                             | BLD                      |                             |                         | Nanog                                                                 |
| 101 | rs111700951      | 1          | 3684                        | 161kb 5' of POM121L12 |                             |                             |                          |                             |                         | BAF155,Mef2,Myc                                                       |
| 102 | rs111787575      | 1          | 3404                        | 161kb 5' of POM121L12 |                             |                             |                          |                             |                         | HNF4,Maf,NR4A,SREBP                                                   |
| 103 | rs111972542      | 1          | 3322                        | 161kb 5' of POM121L12 |                             |                             |                          |                             |                         | Ets,Myf,ZEB1,Znf143                                                   |
| 104 | rs111553333      | 1          | 3275                        | 161kb 5' of POM121L12 |                             |                             |                          |                             |                         | ATF3,ZBTB33                                                           |
| 105 | rs112424724      | 1          | 3245                        | 161kb 5' of POM121L12 |                             |                             |                          |                             |                         |                                                                       |
| 106 | rs112779901      | 1          | 3212                        | 161kb 5' of POM121L12 |                             |                             |                          |                             |                         | Ik-1,NRSF,Zfx                                                         |
| 107 | rs77470508       | 1          | 2627                        | 160kb 5' of POM121L12 |                             |                             |                          |                             |                         | PLAG1,RREB-1,TBX5                                                     |
| 108 | rs112208947      | 1          | 2575                        | 160kb 5' of POM121L12 |                             |                             |                          |                             |                         | ERalpha-a,KAP1                                                        |
| 109 | rs111677539      | 1          | 2089                        | 160kb 5' of POM121L12 |                             |                             |                          |                             |                         | LBP-9,TAL1                                                            |
| 110 | rs113408419      | 1          | 2066                        | 159kb 5' of POM121L12 |                             |                             |                          |                             |                         | HNF1,Pax-4                                                            |
| 111 | rs77618686       | 1          | 1532                        | 159kb 5' of POM121L12 |                             |                             |                          |                             |                         | Homez                                                                 |
| 112 | rs76355749       | 1          | 1219                        | 159kb 5' of POM121L12 |                             |                             |                          |                             |                         | Evi-1,Pou1f1                                                          |
| 113 | rs75588263       | 1          | 1082                        | 158kb 5' of POM121L12 |                             |                             |                          |                             |                         | VDR                                                                   |
| 114 | rs6978398        | 1          | 630                         | 158kb 5' of POM121L12 |                             |                             |                          |                             |                         | CDP                                                                   |
| 115 | rs7779800        | 1          | 169                         | 158kb 5' of POM121L12 |                             |                             |                          |                             |                         | Foxq1,HNF4                                                            |
| 116 | <b>rs7798662</b> | 1          | 0                           | 157kb 5' of POM121L12 |                             |                             |                          |                             |                         | Smad3                                                                 |
| 117 | rs74777222       | 1          | 339                         | 157kb 5' of POM121L12 |                             |                             |                          |                             |                         | Evi-1                                                                 |

|     |             |      |     |                       |  |  |  |  |  |             |
|-----|-------------|------|-----|-----------------------|--|--|--|--|--|-------------|
| 118 | rs117339222 | 0.87 | 900 | 157kb 5' of POM121L12 |  |  |  |  |  | Foxc1,Pax-4 |
|-----|-------------|------|-----|-----------------------|--|--|--|--|--|-------------|

<sup>3</sup>Pair-wise correlation ( $r^2$ ) with rs7798662, <sup>4</sup>Distance from rs7798662 (bp), <sup>5,6</sup>Tissue/cell types in which indicated chromatin marks were detected (NIH Roadmap Epigenomics Consortium), <sup>7</sup>DNase hypersensitivity (Roadmap), <sup>8</sup>Protein recruitment determined by chromatin-immunoprecipitation (ENCODE), <sup>9</sup>Evidence for expression quantitative trait locus (eQTL) (Y: Yes), <sup>10</sup>Predicted binding motifs altered. Annotations extracted from HaploReg-v4 and Regulome-DB. Abbreviations for tissue/cell types accessible online.
